# Supplementary material
Source: PubMed Central journal article supplement (PMC2724115)
Supplement: 00284.2009_1.pdf [file 00284.2009_1.pdf]

## SUPPLEMENTAL DATA

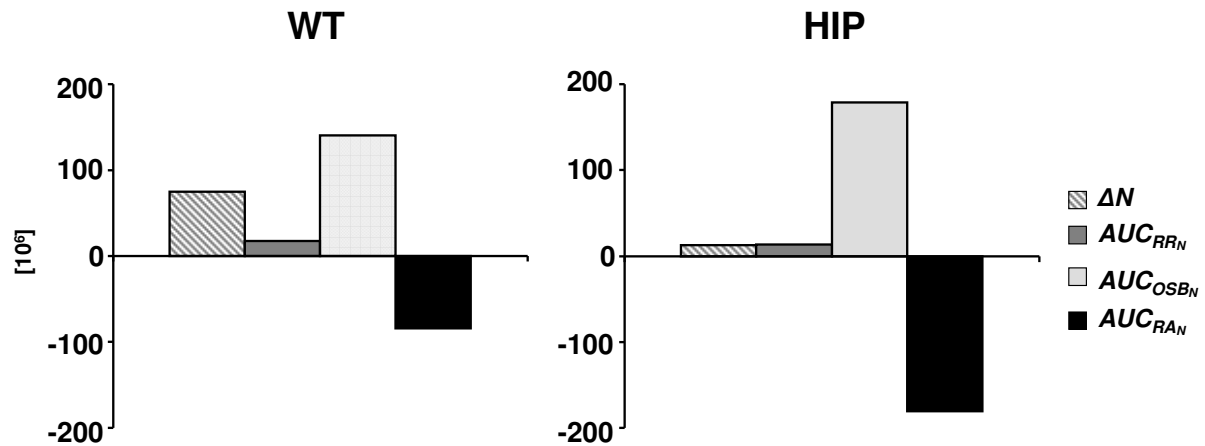

**Figure 1 – supplemental data.  $\beta$ -cell number turnover: overall contributions**

The balance in  $\beta$ -cell number in WT (left panel) and HIP (right panel) rats, aged 0.07-10 months. Striped grey bars represent the net change in  $\beta$ -cell number ( $\Delta N$ ) from age 0.07 to 10 months. The grey and light-grey bars show, respectively, the overall contributions to  $\beta$ -cell number from replication of existing  $\beta$ -cells ( $AUC_{RRN}$ ) and from other sources of  $\beta$ -cells ( $AUC_{OSBN}$ ); the black bars the loss due to  $\beta$ -cell apoptosis ( $AUC_{RAN}$ ).

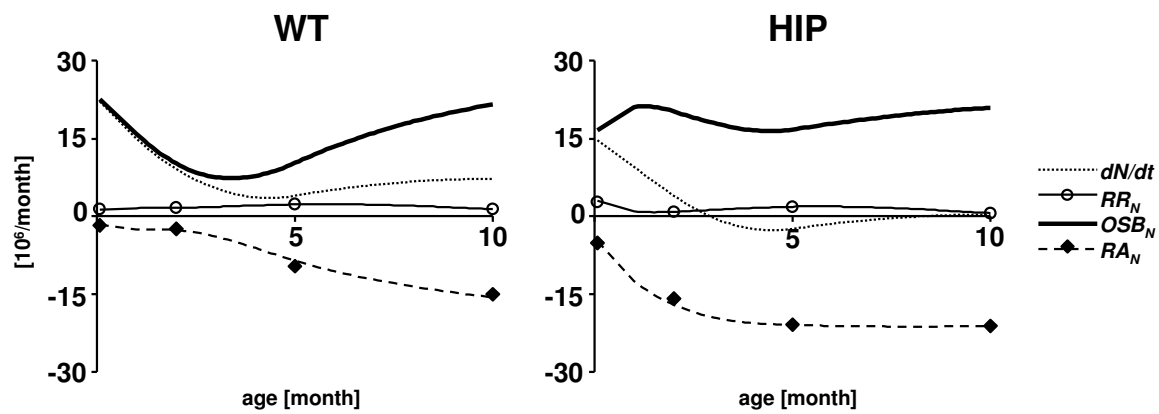

**Figure 2 – supplemental data.  $\beta$ -cell number turnover: time-profiles**

Time profiles of rate of change in  $\beta$ -cell number  $dN/dt$  (dashed thin line), rate of  $\beta$ -cell replication referred to number  $RR_N$  (data: circles; smoothed profile: continuous thin line), other sources of  $\beta$ -cells  $OSB_N$  (continuous line), and rate of  $\beta$ -cell apoptosis referred to number  $RA_N$  (data: rhombuses; smoothed profile: dashed line) in WT (left panel) and HIP rats (right panel), aged 0.07-10 months.

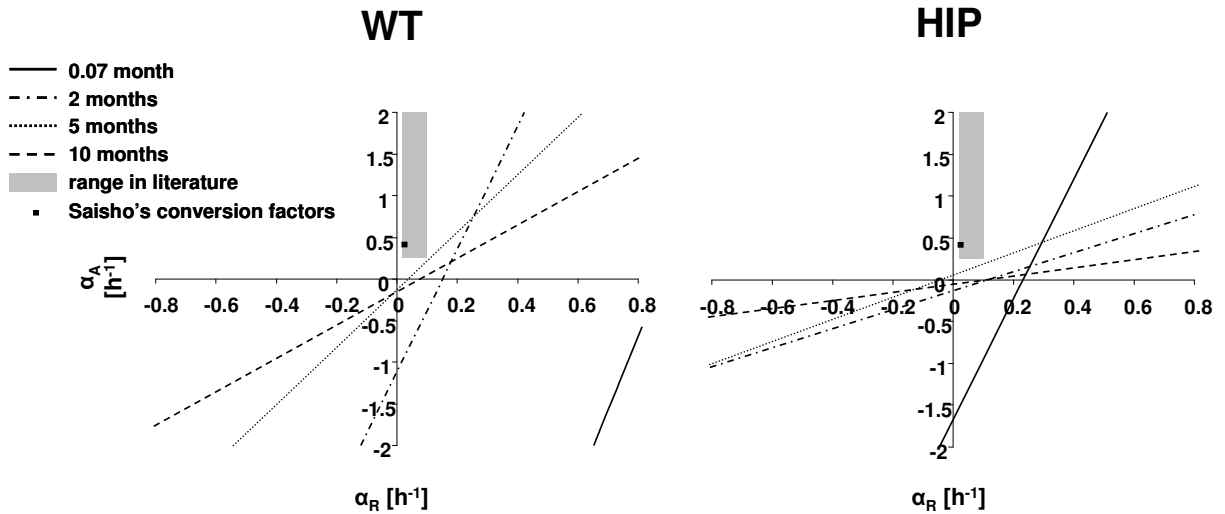

**Figure 3 – supplemental data. Conversion factors for  $\beta$ -cell replication and  $\beta$ -cell apoptosis required to conclude that there is no formation of  $\beta$ -cell from sources independent from  $\beta$ -cell replication.**

The pairs of values for the conversion factors for  $\beta$ -cell replication  $\alpha_R$  and  $\beta$ -cell apoptosis  $\alpha_A$  lying on each line represent possible values for  $\alpha_R$  and  $\alpha_A$  which allow to conclude that OSB is zero. In this figure are depicted those linear relations in WT (left panel) and HIP rats (right panel) for each analyzed age: 0.07 (continuous line), 2 (point-dashed line), 5 (dashed thin line), and 10 months (dashed line). In details, linear relations are obtained from equation 1 (experimental procedures) assuming OSB equal to zero for each time (age) point where the rate of change in  $\beta$ -cell mass,  $\beta$ -cell mass, and frequency of  $\beta$ -cell replication and apoptosis are known.

The required conversion factors that would satisfy the mass balance described by equation 1 (experimental procedures) assuming OSB equal to zero are not in the plausible range (grey rectangle) based on the published literature (1-6):  $0.02-0.1 \text{ h}^{-1}$  for replication (corresponding to period of 10-50h for replication),  $0.25-2 \text{ h}^{-1}$  for apoptosis (corresponding to an execution period of apoptosis of 0.5-4h).

Therefore, this analysis suggests that OSB does exist.

The black square represents the conversion factors measured in  $\beta$ -cells and applied in the present turnover model (7).

**Table 1 – supplemental data. Differences between  $\beta$ -cell mass and  $\beta$ -cell number turnovers in WT and HIP rats over the period 0.07-10 months**

$AUC_{\text{mass turnover}}$  and  $AUC_{\text{number turnover}}$  represent respectively the overall contributions (from either replication or OSB or apoptosis) to  $\Delta M$  (net change in  $\beta$ -cell mass) and  $\Delta N$  (net change in  $\beta$ -cell number).  $\Delta AUC$  is the percent relative difference between  $AUC_{\text{mass turnover}}$  and  $AUC_{\text{number turnover}}$ . The first four columns report the total contributions from replication, other sources of  $\beta$ -cells, and apoptosis to  $\beta$ -cell mass (number) over the period 0.07-10 months in WT and HIP rats. These quantities are expressed as percentage of the net change in  $\beta$ -cell mass (or number) over the same period in order to make possible the comparisons. The last two columns contain the values of this comparison, i.e. percent relative difference.

|                    | <b><math>AUC_{\text{mass turnover}}</math></b> |            | <b><math>AUC_{\text{number turnover}}</math></b> |            | <b><math>\Delta AUC</math></b> |            |
|--------------------|------------------------------------------------|------------|--------------------------------------------------|------------|--------------------------------|------------|
|                    | [% of $\Delta M$ ]                             |            | [% of $\Delta N$ ]                               |            | [%]                            |            |
|                    | <b>WT</b>                                      | <b>HIP</b> | <b>WT</b>                                        | <b>HIP</b> | <b>WT</b>                      | <b>HIP</b> |
| <b>replication</b> | 22                                             | 98         | 24                                               | 110        | 9                              | 12         |
| <b>OSB</b>         | 185                                            | 1369       | 189                                              | 1467       | 2                              | 7          |
| <b>apoptosis</b>   | -107                                           | -1367      | -113                                             | -1477      | 6                              | 8          |

1. **Al-Rubeai M, and Fussenegger M.** *Cell Engineering: Apoptosis*. Dordrecht, The Netherlands: Kluwer Academic Publishers, 2004.
2. **Baker AJ, Mooney A, Hughes J, Lombardi D, Johnson RJ, and Savill J.** Mesangial cell apoptosis: the major mechanism for resolution of glomerular hypercellularity in experimental mesangial proliferative nephritis. *J Clin Invest* 94: 2105-2116, 1994.
3. **Kalashnik L, Bridgeman CJ, King AR, Francis SE, Mikhalovsky S, Wallis C, Denyer SP, Crossman D, and Faragher RG.** A cell kinetic analysis of human umbilical vein endothelial cells. *Mechanisms of ageing and development* 120: 23-32, 2000.
4. **Meier JJ, Ritzel RA, Maedler K, Gurlo T, and Butler PC.** Increased vulnerability of newly forming beta cells to cytokine-induced cell death. *Diabetologia* 49: 83-89, 2006.
5. **Potten C, and Wilson J.** *Apoptosis: The Life and Death of Cells*. New York, NY: Cambridge University Press, 2004.
6. **Ritzel RA, and Butler PC.** Replication increases beta-cell vulnerability to human islet amyloid polypeptide-induced apoptosis. *Diabetes* 52: 1701-1708, 2003.
7. **Saisho Y, Manesso E, Gurlo T, Huang CJ, Toffolo GM, Cobelli C, and Butler PC.** Development of factors to convert frequency to rate for beta-cell replication and apoptosis quantified by time-lapse video microscopy and immunohistochemistry. *Am J Physiol Endocrinol Metab* 296: E89-96, 2009.
